# Supplementary material for: Traumatic Brain Injury in Iraq and Afghanistan Veterans: New Results From a National Random Sample Study
Source: Atypon-hosted journal article supplement (doi:10.1176/appi.neuropsych.16050100), 2017-01-25
Supplement: Correction.pdf [file Correction.pdf]

## **CORRECTION**

When the article “Traumatic Brain Injury in Iraq and Afghanistan Veterans: New Results From a National Random Sample Study,” by Lisa K. Lindquist, M.D., et al. (doi: 10.1176/appi.neuropsych.16050100) was originally published online on January 25, 2017, the race/ethnicity data (White and Nonwhite) pertaining to the study sample were transposed in Table 1. The table was corrected, and the article reposted on February 8, 2017, and will appear as intended in a future issue of the Journal.
